# Supplementary material for: Real-world evidence of safety and influence for lung cancer surgery under COVID-19 pandemic in Japan
Source: PubMed Central journal article supplement — J Thorac Dis. 2023 Feb 3;15(2):542–51. doi: 10.21037/jtd-22-1289 (PMC9992575; doi:10.21037/jtd-22-1289), 2023-02-03
Supplement: jtd-15-02-542-dss.pdf [file jtd-15-02-542-dss.pdf]

## Data Sharing Statement

|                     |                                                                                                                                                    |                                                                                                                                |
|---------------------|----------------------------------------------------------------------------------------------------------------------------------------------------|--------------------------------------------------------------------------------------------------------------------------------|
| <b>Article Info</b> | https://dx.doi.org/10.21037/jtd-22-1289                                                                                                            |                                                                                                                                |
| <b>Item</b>         | <b>Question</b>                                                                                                                                    | <b>Authors' Response<br/>(place "-" if not applicable)</b>                                                                     |
| 1                   | Would you like to share data collected for your study to others?                                                                                   | Yes                                                                                                                            |
| 2                   | If not, would you like to share the reason for your decision?                                                                                      | -                                                                                                                              |
| 3                   | What data in particular will be shared?                                                                                                            | All data generated and/or analyzed during the current study can be shared from the corresponding author on reasonable request. |
| 4                   | Any other documents will be share? Such as study protocol, statistical analysis plan, informed consent form, clinical study report, analytic code. | -                                                                                                                              |
| 5                   | When will data availability begin?                                                                                                                 | From the publication date.                                                                                                     |
| 6                   | When will data availability end?                                                                                                                   | -                                                                                                                              |
| 7                   | To whom will you share the data?                                                                                                                   | We can share to any researchers upon appropriate request.                                                                      |
| 8                   | For what type of analysis or purpose?                                                                                                              | For providing suggestions for us or other researchers.                                                                         |
| 9                   | How or where can the data/documents be obtained?                                                                                                   | Contact with the corresponding author.<br>E-mail: tyoshikawa@med.nagoya-u.ac.jp                                                |
| 10                  | Any other restrictions?                                                                                                                            | -                                                                                                                              |
